# Supplementary material
Source: publisher figshare collection journal article supplement (https://acs.figshare.com/ndownloader/files/5110204)
Supplement: Supplementary file 1 [file 5110204]

 
data_2-190 
 
_audit_creation_method            SHELXL-97 
_chemical_name_systematic 
; 
 ? 
; 
_chemical_name_common             ? 
_chemical_melting_point           ? 
_chemical_formula_moiety          ? 
_chemical_formula_sum 
 'C22 H23 N O4 S' 
_chemical_formula_weight          397.47 
 
loop_ 
 _atom_type_symbol 
 _atom_type_description 
 _atom_type_scat_dispersion_real 
 _atom_type_scat_dispersion_imag 
 _atom_type_scat_source 
 'C'  'C'   0.0033   0.0016 
 'International Tables Vol C Tables 4.2.6.8 and 6.1.1.4' 
 'H'  'H'   0.0000   0.0000 
 'International Tables Vol C Tables 4.2.6.8 and 6.1.1.4' 
 'N'  'N'   0.0061   0.0033 
 'International Tables Vol C Tables 4.2.6.8 and 6.1.1.4' 
 'O'  'O'   0.0106   0.0060 
 'International Tables Vol C Tables 4.2.6.8 and 6.1.1.4' 
 'S'  'S'   0.1246   0.1234 
 'International Tables Vol C Tables 4.2.6.8 and 6.1.1.4' 
 
_symmetry_cell_setting           'Triclinic'
_symmetry_space_group_name_H-M   'P-1   '
 
loop_ 
 _symmetry_equiv_pos_as_xyz 
 'x, y, z' 
 '-x, -y, -z' 
 
_cell_length_a                    8.446(2) 
_cell_length_b                    12.812(3) 
_cell_length_c                    19.021(3) 
_cell_angle_alpha                 88.816(13) 
_cell_angle_beta                  83.451(18) 
_cell_angle_gamma                 89.42(3) 
_cell_volume                      2044.4(8) 
_cell_formula_units_Z             4 
_cell_measurement_temperature     293(2) 
_cell_measurement_reflns_used      26
_cell_measurement_theta_min        4.84
_cell_measurement_theta_max       12.50
 
_exptl_crystal_description       'block             '
_exptl_crystal_colour            'colorless         '
_exptl_crystal_size_max          0.36
_exptl_crystal_size_mid          0.26
_exptl_crystal_size_min          0.20
_exptl_crystal_density_meas       ? 
_exptl_crystal_density_diffrn     1.291 
_exptl_crystal_density_method     'not measured' 
_exptl_crystal_F_000              840 
_exptl_absorpt_coefficient_mu     0.186 
_exptl_absorpt_correction_type   'empirical'
_exptl_absorpt_correction_T_min  0.5438
_exptl_absorpt_correction_T_max  0.8588
_exptl_absorpt_process_details    ? 
 
_exptl_special_details 
; 
 ? 
; 
 
_diffrn_ambient_temperature       293(2) 
_diffrn_radiation_wavelength      0.71073 
_diffrn_radiation_type           'MoK\a'
_diffrn_radiation_source         'sealed tube'
_diffrn_radiation_monochromator  'graphite'
_diffrn_measurement_device       'Siemens P4'
_diffrn_measurement_method       '\w scans'
_diffrn_detector_area_resol_mean  ? 
_diffrn_standards_number            3
_diffrn_standards_interval_count   97
_diffrn_standards_interval_time   ? 
_diffrn_standards_decay_%         ? 
_diffrn_reflns_number             6892 
_diffrn_reflns_av_R_equivalents   0.0247 
_diffrn_reflns_av_sigmaI/netI     0.0599 
_diffrn_reflns_limit_h_min        0 
_diffrn_reflns_limit_h_max        9 
_diffrn_reflns_limit_k_min        -14 
_diffrn_reflns_limit_k_max        14 
_diffrn_reflns_limit_l_min        -21 
_diffrn_reflns_limit_l_max        21 
_diffrn_reflns_theta_min          1.90 
_diffrn_reflns_theta_max          24.00 
_reflns_number_total              6232 
_reflns_number_gt                 3753 
_reflns_threshold_expression      >2sigma(I) 
 
_computing_data_collection      'Siemens XSCANS'
_computing_cell_refinement      'Siemens XSCANS'
_computing_data_reduction       'Siemens SHELXTL'
_computing_structure_solution   'Siemens SHELXTL'
_computing_structure_refinement 'Siemens SHELXTL'
_computing_molecular_graphics   'Siemens SHELXTL'
_computing_publication_material 'Siemens SHELXTL'
 
_refine_special_details 
; 
 Refinement of F^2^ against ALL reflections.  The weighted R-factor wR and 
 goodness of fit S are based on F^2^, conventional R-factors R are based 
 on F, with F set to zero for negative F^2^. The threshold expression of 
 F^2^ > 2sigma(F^2^) is used only for calculating R-factors(gt) etc. and is 
 not relevant to the choice of reflections for refinement.  R-factors based 
 on F^2^ are statistically about twice as large as those based on F, and R- 
 factors based on ALL data will be even larger. 
; 
 
_refine_ls_structure_factor_coef  Fsqd  
_refine_ls_matrix_type            full 
_refine_ls_weighting_scheme       calc  
_refine_ls_weighting_details 
 'calc w=1/[\s^2^(Fo^2^)+(0.1004P)^2^+0.9048P] where P=(Fo^2^+2Fc^2^)/3' 
_atom_sites_solution_primary      direct 
_atom_sites_solution_secondary    difmap 
_atom_sites_solution_hydrogens    geom 
_refine_ls_hydrogen_treatment     constr 
_refine_ls_extinction_method      none 
_refine_ls_extinction_coef        ? 
_refine_ls_number_reflns          6232 
_refine_ls_number_parameters      505 
_refine_ls_number_restraints      0 
_refine_ls_R_factor_all           0.1163 
_refine_ls_R_factor_gt            0.0679 
_refine_ls_wR_factor_ref          0.2014 
_refine_ls_wR_factor_gt           0.1679 
_refine_ls_goodness_of_fit_ref    1.009 
_refine_ls_restrained_S_all       1.009 
_refine_ls_shift/su_max           0.002 
_refine_ls_shift/su_mean          0.000 
 
loop_ 
 _atom_site_label 
 _atom_site_type_symbol 
 _atom_site_fract_x 
 _atom_site_fract_y 
 _atom_site_fract_z 
 _atom_site_U_iso_or_equiv 
 _atom_site_adp_type 
 _atom_site_occupancy 
 _atom_site_symmetry_multiplicity 
 _atom_site_calc_flag 
 _atom_site_refinement_flags 
 _atom_site_disorder_assembly 
 _atom_site_disorder_group 
S1 S 0.43034(16) 1.41838(10) 0.35943(6) 0.0710(4) Uani 1 1 d . . . 
S2 S 0.14989(15) 0.92260(9) 0.36390(6) 0.0679(4) Uani 1 1 d . . . 
O1 O 0.5237(5) 1.8071(3) 0.0954(2) 0.0986(12) Uani 1 1 d . . . 
O2 O 0.5440(4) 1.7382(2) 0.20288(18) 0.0729(9) Uani 1 1 d . . . 
O3 O 0.5351(4) 1.4317(3) 0.41252(18) 0.0964(12) Uani 1 1 d . . . 
O4 O 0.3938(4) 1.3158(2) 0.33755(18) 0.0879(11) Uani 1 1 d . . . 
O5 O 0.1742(5) 1.3149(3) 0.1026(2) 0.0953(12) Uani 1 1 d . . . 
O6 O 0.1015(4) 1.2444(2) 0.20996(18) 0.0702(9) Uani 1 1 d . . . 
O7 O 0.2025(4) 0.8213(2) 0.34096(17) 0.0834(10) Uani 1 1 d . . . 
O8 O 0.0181(4) 0.9343(3) 0.41791(16) 0.0906(11) Uani 1 1 d . . . 
N1 N 0.5127(4) 1.4802(3) 0.28855(18) 0.0609(9) Uani 1 1 d . . . 
N2 N 0.0997(4) 0.9851(2) 0.29406(16) 0.0557(9) Uani 1 1 d . . . 
C1 C 0.5648(5) 1.5906(3) 0.2963(2) 0.0650(12) Uani 1 1 d . . . 
H1A H 0.5240 1.6186 0.3419 0.078 Uiso 1 1 calc R . . 
H1B H 0.6799 1.5970 0.2893 0.078 Uiso 1 1 calc R . . 
C2 C 0.4876(5) 1.6410(3) 0.2369(2) 0.0600(11) Uani 1 1 d . . . 
H2 H 0.3726 1.6467 0.2509 0.072 Uiso 1 1 calc R . . 
C3 C 0.5115(6) 1.7321(4) 0.1337(3) 0.0729(14) Uani 1 1 d . . . 
C4 C 0.4659(6) 1.6228(4) 0.1193(2) 0.0658(12) Uani 1 1 d . . . 
C5 C 0.3915(7) 1.5979(5) 0.0653(3) 0.0972(18) Uani 1 1 d . . . 
H5A H 0.3609 1.5292 0.0600 0.117 Uiso 1 1 calc R . . 
H5B H 0.3693 1.6489 0.0322 0.117 Uiso 1 1 calc R . . 
C6 C 0.5178(5) 1.5613(3) 0.1798(2) 0.0569(11) Uani 1 1 d . . . 
H6 H 0.6334 1.5513 0.1705 0.068 Uiso 1 1 calc R . . 
C7 C 0.4496(5) 1.4630(3) 0.2180(2) 0.0569(11) Uani 1 1 d . . . 
H7 H 0.3329 1.4670 0.2240 0.068 Uiso 1 1 calc R . . 
C8 C 0.5039(5) 1.3602(3) 0.1844(2) 0.0632(11) Uani 1 1 d . . . 
H8A H 0.4859 1.3638 0.1349 0.076 Uiso 1 1 calc R . . 
H8B H 0.4368 1.3052 0.2068 0.076 Uiso 1 1 calc R . . 
C9 C 0.6782(5) 1.3287(3) 0.1884(3) 0.0713(13) Uani 1 1 d . . . 
H9A H 0.7479 1.3807 0.1638 0.086 Uiso 1 1 calc R . . 
H9B H 0.6994 1.3251 0.2374 0.086 Uiso 1 1 calc R . . 
C10 C 0.7109(5) 1.2239(3) 0.1549(3) 0.0590(11) Uani 1 1 d . . . 
C11 C 0.7843(6) 1.2139(4) 0.0870(3) 0.0731(13) Uani 1 1 d . . . 
H11 H 0.8225 1.2731 0.0617 0.088 Uiso 1 1 calc R . . 
C12 C 0.8022(7) 1.1173(4) 0.0555(3) 0.0853(15) Uani 1 1 d . . . 
H12 H 0.8525 1.1123 0.0096 0.102 Uiso 1 1 calc R . . 
C13 C 0.7463(7) 1.0292(4) 0.0917(3) 0.0807(15) Uani 1 1 d . . . 
H13 H 0.7553 0.9645 0.0703 0.097 Uiso 1 1 calc R . . 
C14 C 0.6762(6) 1.0382(4) 0.1608(3) 0.0761(14) Uani 1 1 d . . . 
H14 H 0.6405 0.9788 0.1865 0.091 Uiso 1 1 calc R . . 
C15 C 0.6591(5) 1.1337(3) 0.1917(3) 0.0664(12) Uani 1 1 d . . . 
H15 H 0.6119 1.1382 0.2381 0.080 Uiso 1 1 calc R . . 
C16 C 0.2504(5) 1.4838(3) 0.3867(2) 0.0592(11) Uani 1 1 d . . . 
C17 C 0.1103(6) 1.4561(3) 0.3592(2) 0.0647(12) Uani 1 1 d . . . 
H17 H 0.1105 1.4006 0.3284 0.078 Uiso 1 1 calc R . . 
C18 C -0.0268(6) 1.5113(4) 0.3778(2) 0.0722(13) Uani 1 1 d . . . 
H18 H -0.1196 1.4921 0.3595 0.087 Uiso 1 1 calc R . . 
C19 C -0.0319(6) 1.5950(4) 0.4230(2) 0.0655(12) Uani 1 1 d . . . 
C20 C 0.1058(6) 1.6200(4) 0.4502(3) 0.0721(13) Uani 1 1 d . . . 
H20 H 0.1049 1.6760 0.4806 0.087 Uiso 1 1 calc R . . 
C21 C 0.2461(6) 1.5649(4) 0.4340(2) 0.0711(13) Uani 1 1 d . . . 
H21 H 0.3368 1.5821 0.4545 0.085 Uiso 1 1 calc R . . 
C22 C -0.1803(7) 1.6586(4) 0.4411(3) 0.0922(16) Uani 1 1 d . . . 
H22A H -0.2653 1.6306 0.4180 0.138 Uiso 1 1 calc R . . 
H22B H -0.1615 1.7296 0.4256 0.138 Uiso 1 1 calc R . . 
H22C H -0.2092 1.6562 0.4914 0.138 Uiso 1 1 calc R . . 
C23 C 0.0398(5) 1.0957(3) 0.3025(2) 0.0644(12) Uani 1 1 d . . . 
H23A H -0.0723 1.1020 0.2962 0.077 Uiso 1 1 calc R . . 
H23B H 0.0577 1.1235 0.3480 0.077 Uiso 1 1 calc R . . 
C24 C 0.1442(5) 1.1467(3) 0.2427(2) 0.0564(10) Uani 1 1 d . . . 
H24 H 0.2521 1.1525 0.2563 0.068 Uiso 1 1 calc R . . 
C25 C 0.1692(6) 1.2388(3) 0.1400(3) 0.0674(13) Uani 1 1 d . . . 
C26 C 0.2268(5) 1.1298(3) 0.1251(2) 0.0569(11) Uani 1 1 d . . . 
C27 C 0.3313(6) 1.1067(4) 0.0711(2) 0.0769(14) Uani 1 1 d . . . 
H27A H 0.3689 1.0386 0.0656 0.092 Uiso 1 1 calc R . . 
H27B H 0.3677 1.1585 0.0385 0.092 Uiso 1 1 calc R . . 
C28 C 0.1461(5) 1.0677(3) 0.1852(2) 0.0499(10) Uani 1 1 d . . . 
H28 H 0.0355 1.0582 0.1758 0.060 Uiso 1 1 calc R . . 
C29 C 0.1963(5) 0.9693(3) 0.2226(2) 0.0519(10) Uani 1 1 d . . . 
H29 H 0.3101 0.9729 0.2279 0.062 Uiso 1 1 calc R . . 
C30 C 0.1620(5) 0.8664(3) 0.1890(2) 0.0541(10) Uani 1 1 d . . . 
H30A H 0.2199 0.8114 0.2111 0.065 Uiso 1 1 calc R . . 
H30B H 0.2038 0.8701 0.1393 0.065 Uiso 1 1 calc R . . 
C31 C -0.0126(5) 0.8357(3) 0.1942(3) 0.0699(13) Uani 1 1 d . . . 
H31A H -0.0574 0.8334 0.2435 0.084 Uiso 1 1 calc R . . 
H31B H -0.0714 0.8876 0.1696 0.084 Uiso 1 1 calc R . . 
C32 C -0.0291(5) 0.7311(3) 0.1622(2) 0.0557(10) Uani 1 1 d . . . 
C33 C -0.0749(5) 0.7211(4) 0.0950(2) 0.0667(12) Uani 1 1 d . . . 
H33 H -0.1009 0.7805 0.0697 0.080 Uiso 1 1 calc R . . 
C34 C -0.0823(6) 0.6240(4) 0.0652(3) 0.0746(13) Uani 1 1 d . . . 
H34 H -0.1137 0.6186 0.0201 0.089 Uiso 1 1 calc R . . 
C35 C -0.0440(6) 0.5367(4) 0.1013(3) 0.0711(13) Uani 1 1 d . . . 
H35 H -0.0462 0.4716 0.0807 0.085 Uiso 1 1 calc R . . 
C36 C -0.0017(6) 0.5454(3) 0.1688(3) 0.0704(13) Uani 1 1 d . . . 
H36 H 0.0229 0.4858 0.1942 0.084 Uiso 1 1 calc R . . 
C37 C 0.0044(5) 0.6413(3) 0.1987(2) 0.0619(11) Uani 1 1 d . . . 
H37 H 0.0317 0.6458 0.2445 0.074 Uiso 1 1 calc R . . 
C38 C 0.3135(5) 0.9883(3) 0.3904(2) 0.0574(11) Uani 1 1 d . . . 
C39 C 0.2897(6) 1.0681(4) 0.4387(2) 0.0660(12) Uani 1 1 d . . . 
H39 H 0.1878 1.0840 0.4599 0.079 Uiso 1 1 calc R . . 
C40 C 0.4209(6) 1.1240(3) 0.4551(2) 0.0660(12) Uani 1 1 d . . . 
H40 H 0.4048 1.1785 0.4868 0.079 Uiso 1 1 calc R . . 
C41 C 0.5732(6) 1.1009(3) 0.4259(2) 0.0608(11) Uani 1 1 d . . . 
C42 C 0.5938(6) 1.0186(4) 0.3804(2) 0.0662(12) Uani 1 1 d . . . 
H42 H 0.6964 1.0000 0.3615 0.079 Uiso 1 1 calc R . . 
C43 C 0.4674(6) 0.9635(4) 0.3622(2) 0.0643(12) Uani 1 1 d . . . 
H43 H 0.4849 0.9090 0.3307 0.077 Uiso 1 1 calc R . . 
C44 C 0.7104(6) 1.1652(4) 0.4447(3) 0.0859(15) Uani 1 1 d . . . 
H44A H 0.8081 1.1395 0.4202 0.129 Uiso 1 1 calc R . . 
H44B H 0.7156 1.1601 0.4949 0.129 Uiso 1 1 calc R . . 
H44C H 0.6947 1.2368 0.4312 0.129 Uiso 1 1 calc R . . 
 
loop_ 
 _atom_site_aniso_label 
 _atom_site_aniso_U_11 
 _atom_site_aniso_U_22 
 _atom_site_aniso_U_33 
 _atom_site_aniso_U_23 
 _atom_site_aniso_U_13 
 _atom_site_aniso_U_12 
S1 0.0776(9) 0.0701(8) 0.0645(8) 0.0233(6) -0.0102(6) 0.0084(6) 
S2 0.0760(8) 0.0724(8) 0.0541(7) 0.0193(6) -0.0054(6) -0.0151(6) 
O1 0.105(3) 0.067(2) 0.114(3) 0.043(2) 0.021(2) 0.0118(19) 
O2 0.074(2) 0.0494(17) 0.090(2) 0.0115(16) 0.0101(18) -0.0001(14) 
O3 0.089(3) 0.130(3) 0.073(2) 0.026(2) -0.028(2) 0.014(2) 
O4 0.113(3) 0.0503(19) 0.096(2) 0.0255(17) 0.001(2) 0.0067(17) 
O5 0.119(3) 0.065(2) 0.109(3) 0.037(2) -0.048(2) -0.0102(19) 
O6 0.080(2) 0.0461(17) 0.088(2) 0.0017(15) -0.0272(19) 0.0047(14) 
O7 0.117(3) 0.0536(19) 0.081(2) 0.0236(16) -0.022(2) -0.0101(18) 
O8 0.078(2) 0.132(3) 0.0578(19) 0.0197(19) 0.0095(18) -0.030(2) 
N1 0.067(2) 0.059(2) 0.057(2) 0.0091(17) -0.0070(18) -0.0039(17) 
N2 0.061(2) 0.057(2) 0.0476(19) 0.0073(16) -0.0020(16) -0.0022(16) 
C1 0.064(3) 0.062(3) 0.069(3) 0.001(2) -0.005(2) -0.009(2) 
C2 0.053(3) 0.051(2) 0.073(3) 0.010(2) 0.001(2) -0.0008(19) 
C3 0.064(3) 0.061(3) 0.088(4) 0.020(3) 0.014(3) 0.017(2) 
C4 0.064(3) 0.066(3) 0.064(3) 0.017(2) 0.002(2) 0.011(2) 
C5 0.108(5) 0.102(4) 0.082(4) 0.025(3) -0.014(4) 0.004(3) 
C6 0.052(2) 0.053(2) 0.063(3) 0.012(2) 0.002(2) 0.0094(19) 
C7 0.054(3) 0.050(2) 0.066(3) 0.007(2) -0.006(2) 0.0022(19) 
C8 0.061(3) 0.056(3) 0.075(3) 0.008(2) -0.013(2) -0.003(2) 
C9 0.059(3) 0.056(3) 0.102(4) -0.005(2) -0.017(3) -0.003(2) 
C10 0.051(2) 0.050(2) 0.078(3) 0.001(2) -0.015(2) -0.0002(19) 
C11 0.076(3) 0.063(3) 0.081(3) 0.017(3) -0.015(3) -0.003(2) 
C12 0.102(4) 0.087(4) 0.069(3) -0.011(3) -0.014(3) 0.011(3) 
C13 0.090(4) 0.058(3) 0.099(4) -0.011(3) -0.029(3) 0.012(3) 
C14 0.072(3) 0.054(3) 0.104(4) 0.020(3) -0.022(3) -0.002(2) 
C15 0.064(3) 0.055(3) 0.080(3) 0.008(2) -0.011(2) 0.004(2) 
C16 0.069(3) 0.057(3) 0.051(2) 0.016(2) -0.008(2) -0.007(2) 
C17 0.083(3) 0.057(3) 0.055(3) 0.007(2) -0.012(2) -0.006(2) 
C18 0.069(3) 0.086(3) 0.063(3) 0.007(3) -0.010(3) -0.008(3) 
C19 0.071(3) 0.070(3) 0.052(3) 0.017(2) 0.002(2) -0.001(2) 
C20 0.086(4) 0.060(3) 0.068(3) 0.001(2) 0.002(3) -0.006(3) 
C21 0.075(3) 0.076(3) 0.064(3) 0.008(3) -0.017(3) -0.015(3) 
C22 0.091(4) 0.091(4) 0.092(4) 0.005(3) 0.000(3) 0.017(3) 
C23 0.066(3) 0.066(3) 0.061(3) -0.004(2) -0.005(2) 0.008(2) 
C24 0.055(3) 0.047(2) 0.068(3) 0.000(2) -0.011(2) 0.0020(19) 
C25 0.077(3) 0.053(3) 0.077(3) 0.015(2) -0.031(3) -0.012(2) 
C26 0.065(3) 0.055(3) 0.052(2) 0.013(2) -0.013(2) -0.008(2) 
C27 0.086(4) 0.087(3) 0.057(3) 0.017(3) -0.012(3) -0.014(3) 
C28 0.049(2) 0.048(2) 0.054(2) 0.0036(19) -0.0116(19) -0.0073(18) 
C29 0.050(2) 0.056(2) 0.049(2) 0.0064(19) -0.0054(19) -0.0027(18) 
C30 0.056(3) 0.047(2) 0.058(2) 0.0022(19) -0.002(2) 0.0045(18) 
C31 0.059(3) 0.057(3) 0.094(3) -0.010(2) -0.009(3) 0.004(2) 
C32 0.053(2) 0.043(2) 0.070(3) -0.005(2) -0.002(2) 0.0081(18) 
C33 0.070(3) 0.061(3) 0.069(3) 0.010(2) -0.006(2) 0.001(2) 
C34 0.076(3) 0.085(4) 0.061(3) -0.009(3) 0.002(3) -0.005(3) 
C35 0.075(3) 0.054(3) 0.081(3) -0.014(3) 0.006(3) -0.009(2) 
C36 0.074(3) 0.047(3) 0.087(4) 0.015(2) 0.000(3) 0.004(2) 
C37 0.060(3) 0.057(3) 0.069(3) 0.004(2) -0.006(2) -0.006(2) 
C38 0.066(3) 0.061(3) 0.044(2) 0.014(2) -0.002(2) -0.002(2) 
C39 0.061(3) 0.082(3) 0.053(3) 0.010(2) -0.001(2) 0.006(2) 
C40 0.081(4) 0.059(3) 0.059(3) 0.001(2) -0.013(3) 0.002(2) 
C41 0.065(3) 0.063(3) 0.054(3) 0.017(2) -0.010(2) -0.003(2) 
C42 0.062(3) 0.069(3) 0.066(3) 0.006(2) -0.001(2) 0.008(2) 
C43 0.073(3) 0.067(3) 0.052(3) 0.008(2) -0.003(2) 0.002(2) 
C44 0.081(4) 0.087(4) 0.090(4) 0.004(3) -0.012(3) -0.013(3) 
 
_geom_special_details 
; 
 All esds (except the esd in the dihedral angle between two l.s. planes) 
 are estimated using the full covariance matrix.  The cell esds are taken 
 into account individually in the estimation of esds in distances, angles 
 and torsion angles; correlations between esds in cell parameters are only 
 used when they are defined by crystal symmetry.  An approximate (isotropic) 
 treatment of cell esds is used for estimating esds involving l.s. planes. 
; 
 
loop_ 
 _geom_bond_atom_site_label_1 
 _geom_bond_atom_site_label_2 
 _geom_bond_distance 
 _geom_bond_site_symmetry_2 
 _geom_bond_publ_flag 
S1 O3 1.430(4) . ? 
S1 O4 1.434(3) . ? 
S1 N1 1.638(3) . ? 
S1 C16 1.759(5) . ? 
S2 O7 1.428(3) . ? 
S2 O8 1.435(3) . ? 
S2 N2 1.632(3) . ? 
S2 C38 1.753(5) . ? 
O1 C3 1.192(5) . ? 
O2 C3 1.379(6) . ? 
O2 C2 1.451(5) . ? 
O5 C25 1.193(5) . ? 
O6 C25 1.390(6) . ? 
O6 C24 1.447(5) . ? 
N1 C1 1.501(5) . ? 
N1 C7 1.520(5) . ? 
N2 C23 1.506(5) . ? 
N2 C29 1.521(5) . ? 
C1 C2 1.499(6) . ? 
C2 C6 1.505(6) . ? 
C3 C4 1.495(7) . ? 
C4 C5 1.311(7) . ? 
C4 C6 1.486(6) . ? 
C6 C7 1.526(5) . ? 
C7 C8 1.520(5) . ? 
C8 C9 1.532(6) . ? 
C9 C10 1.508(6) . ? 
C10 C11 1.376(6) . ? 
C10 C15 1.387(6) . ? 
C11 C12 1.384(6) . ? 
C12 C13 1.370(7) . ? 
C13 C14 1.385(7) . ? 
C14 C15 1.366(6) . ? 
C16 C21 1.385(6) . ? 
C16 C17 1.400(6) . ? 
C17 C18 1.366(6) . ? 
C18 C19 1.386(6) . ? 
C19 C20 1.369(7) . ? 
C19 C22 1.499(7) . ? 
C20 C21 1.380(7) . ? 
C23 C24 1.500(6) . ? 
C24 C28 1.504(5) . ? 
C25 C26 1.497(6) . ? 
C26 C27 1.311(6) . ? 
C26 C28 1.484(5) . ? 
C28 C29 1.515(5) . ? 
C29 C30 1.522(5) . ? 
C30 C31 1.522(6) . ? 
C31 C32 1.498(5) . ? 
C32 C37 1.374(6) . ? 
C32 C33 1.386(6) . ? 
C33 C34 1.383(6) . ? 
C34 C35 1.356(6) . ? 
C35 C36 1.379(6) . ? 
C36 C37 1.368(6) . ? 
C38 C43 1.385(6) . ? 
C38 C39 1.386(6) . ? 
C39 C40 1.394(6) . ? 
C40 C41 1.374(6) . ? 
C41 C42 1.375(6) . ? 
C41 C44 1.508(6) . ? 
C42 C43 1.367(6) . ? 
 
loop_ 
 _geom_angle_atom_site_label_1 
 _geom_angle_atom_site_label_2 
 _geom_angle_atom_site_label_3 
 _geom_angle 
 _geom_angle_site_symmetry_1 
 _geom_angle_site_symmetry_3 
 _geom_angle_publ_flag 
O3 S1 O4 120.4(2) . . ? 
O3 S1 N1 106.0(2) . . ? 
O4 S1 N1 106.39(19) . . ? 
O3 S1 C16 108.0(2) . . ? 
O4 S1 C16 108.4(2) . . ? 
N1 S1 C16 106.94(19) . . ? 
O7 S2 O8 120.6(2) . . ? 
O7 S2 N2 106.37(18) . . ? 
O8 S2 N2 106.1(2) . . ? 
O7 S2 C38 108.1(2) . . ? 
O8 S2 C38 108.2(2) . . ? 
N2 S2 C38 106.69(18) . . ? 
C3 O2 C2 105.5(3) . . ? 
C25 O6 C24 105.0(3) . . ? 
C1 N1 C7 112.4(3) . . ? 
C1 N1 S1 117.9(3) . . ? 
C7 N1 S1 119.3(3) . . ? 
C23 N2 C29 111.9(3) . . ? 
C23 N2 S2 118.1(3) . . ? 
C29 N2 S2 119.7(3) . . ? 
C2 C1 N1 99.1(3) . . ? 
O2 C2 C1 122.5(4) . . ? 
O2 C2 C6 104.4(3) . . ? 
C1 C2 C6 101.9(3) . . ? 
O1 C3 O2 120.5(5) . . ? 
O1 C3 C4 130.0(5) . . ? 
O2 C3 C4 109.4(4) . . ? 
C5 C4 C6 133.0(5) . . ? 
C5 C4 C3 123.3(5) . . ? 
C6 C4 C3 103.6(4) . . ? 
C4 C6 C2 99.4(3) . . ? 
C4 C6 C7 131.2(4) . . ? 
C2 C6 C7 101.5(3) . . ? 
C8 C7 N1 113.5(3) . . ? 
C8 C7 C6 115.8(4) . . ? 
N1 C7 C6 97.6(3) . . ? 
C7 C8 C9 116.4(4) . . ? 
C10 C9 C8 109.6(3) . . ? 
C11 C10 C15 117.8(4) . . ? 
C11 C10 C9 122.3(4) . . ? 
C15 C10 C9 119.8(4) . . ? 
C10 C11 C12 121.2(5) . . ? 
C13 C12 C11 120.3(5) . . ? 
C12 C13 C14 118.8(5) . . ? 
C15 C14 C13 120.6(5) . . ? 
C14 C15 C10 121.2(5) . . ? 
C21 C16 C17 119.2(4) . . ? 
C21 C16 S1 120.8(4) . . ? 
C17 C16 S1 120.0(4) . . ? 
C18 C17 C16 119.5(4) . . ? 
C17 C18 C19 122.0(5) . . ? 
C20 C19 C18 117.6(5) . . ? 
C20 C19 C22 120.1(5) . . ? 
C18 C19 C22 122.2(5) . . ? 
C19 C20 C21 122.2(5) . . ? 
C20 C21 C16 119.4(5) . . ? 
C24 C23 N2 99.1(3) . . ? 
O6 C24 C23 122.4(3) . . ? 
O6 C24 C28 104.9(3) . . ? 
C23 C24 C28 102.4(3) . . ? 
O5 C25 O6 119.9(5) . . ? 
O5 C25 C26 130.6(5) . . ? 
O6 C25 C26 109.5(4) . . ? 
C27 C26 C28 133.6(4) . . ? 
C27 C26 C25 122.9(4) . . ? 
C28 C26 C25 103.4(4) . . ? 
C26 C28 C24 99.5(3) . . ? 
C26 C28 C29 131.5(4) . . ? 
C24 C28 C29 101.7(3) . . ? 
C28 C29 N2 98.6(3) . . ? 
C28 C29 C30 116.5(3) . . ? 
N2 C29 C30 113.3(3) . . ? 
C29 C30 C31 115.8(3) . . ? 
C32 C31 C30 110.4(3) . . ? 
C37 C32 C33 117.8(4) . . ? 
C37 C32 C31 120.5(4) . . ? 
C33 C32 C31 121.7(4) . . ? 
C34 C33 C32 120.8(4) . . ? 
C35 C34 C33 120.4(5) . . ? 
C34 C35 C36 119.3(4) . . ? 
C37 C36 C35 120.4(4) . . ? 
C36 C37 C32 121.3(4) . . ? 
C43 C38 C39 119.1(4) . . ? 
C43 C38 S2 120.8(4) . . ? 
C39 C38 S2 120.1(4) . . ? 
C38 C39 C40 119.0(4) . . ? 
C41 C40 C39 121.9(4) . . ? 
C40 C41 C42 117.8(4) . . ? 
C40 C41 C44 119.6(4) . . ? 
C42 C41 C44 122.6(5) . . ? 
C43 C42 C41 121.7(4) . . ? 
C42 C43 C38 120.5(4) . . ? 
 
loop_ 
 _geom_torsion_atom_site_label_1 
 _geom_torsion_atom_site_label_2 
 _geom_torsion_atom_site_label_3 
 _geom_torsion_atom_site_label_4 
 _geom_torsion 
 _geom_torsion_site_symmetry_1 
 _geom_torsion_site_symmetry_2 
 _geom_torsion_site_symmetry_3 
 _geom_torsion_site_symmetry_4 
 _geom_torsion_publ_flag 
O3 S1 N1 C1 -50.3(4) . . . . ? 
O4 S1 N1 C1 -179.5(3) . . . . ? 
C16 S1 N1 C1 64.7(4) . . . . ? 
O3 S1 N1 C7 167.5(3) . . . . ? 
O4 S1 N1 C7 38.2(3) . . . . ? 
C16 S1 N1 C7 -77.5(3) . . . . ? 
O7 S2 N2 C23 -179.6(3) . . . . ? 
O8 S2 N2 C23 50.8(4) . . . . ? 
C38 S2 N2 C23 -64.4(4) . . . . ? 
O7 S2 N2 C29 -37.3(3) . . . . ? 
O8 S2 N2 C29 -166.9(3) . . . . ? 
C38 S2 N2 C29 77.9(3) . . . . ? 
C7 N1 C1 C2 14.8(4) . . . . ? 
S1 N1 C1 C2 -129.9(3) . . . . ? 
C3 O2 C2 C1 148.6(4) . . . . ? 
C3 O2 C2 C6 34.1(4) . . . . ? 
N1 C1 C2 O2 -156.6(4) . . . . ? 
N1 C1 C2 C6 -40.8(4) . . . . ? 
C2 O2 C3 O1 169.1(4) . . . . ? 
C2 O2 C3 C4 -11.8(5) . . . . ? 
O1 C3 C4 C5 -18.5(8) . . . . ? 
O2 C3 C4 C5 162.6(5) . . . . ? 
O1 C3 C4 C6 164.0(5) . . . . ? 
O2 C3 C4 C6 -15.0(5) . . . . ? 
C5 C4 C6 C2 -143.4(6) . . . . ? 
C3 C4 C6 C2 33.7(4) . . . . ? 
C5 C4 C6 C7 -28.9(8) . . . . ? 
C3 C4 C6 C7 148.3(4) . . . . ? 
O2 C2 C6 C4 -41.9(4) . . . . ? 
C1 C2 C6 C4 -170.3(3) . . . . ? 
O2 C2 C6 C7 -177.6(3) . . . . ? 
C1 C2 C6 C7 54.0(4) . . . . ? 
C1 N1 C7 C8 138.8(4) . . . . ? 
S1 N1 C7 C8 -77.1(4) . . . . ? 
C1 N1 C7 C6 16.4(4) . . . . ? 
S1 N1 C7 C6 160.5(3) . . . . ? 
C4 C6 C7 C8 84.4(6) . . . . ? 
C2 C6 C7 C8 -161.9(3) . . . . ? 
C4 C6 C7 N1 -154.9(4) . . . . ? 
C2 C6 C7 N1 -41.2(4) . . . . ? 
N1 C7 C8 C9 -41.6(5) . . . . ? 
C6 C7 C8 C9 70.0(5) . . . . ? 
C7 C8 C9 C10 178.1(4) . . . . ? 
C8 C9 C10 C11 99.7(5) . . . . ? 
C8 C9 C10 C15 -77.0(5) . . . . ? 
C15 C10 C11 C12 1.7(7) . . . . ? 
C9 C10 C11 C12 -175.1(4) . . . . ? 
C10 C11 C12 C13 0.2(8) . . . . ? 
C11 C12 C13 C14 -1.9(8) . . . . ? 
C12 C13 C14 C15 1.8(8) . . . . ? 
C13 C14 C15 C10 0.1(7) . . . . ? 
C11 C10 C15 C14 -1.8(7) . . . . ? 
C9 C10 C15 C14 175.0(4) . . . . ? 
O3 S1 C16 C21 23.5(4) . . . . ? 
O4 S1 C16 C21 155.5(3) . . . . ? 
N1 S1 C16 C21 -90.2(4) . . . . ? 
O3 S1 C16 C17 -158.3(3) . . . . ? 
O4 S1 C16 C17 -26.4(4) . . . . ? 
N1 S1 C16 C17 88.0(4) . . . . ? 
C21 C16 C17 C18 1.8(6) . . . . ? 
S1 C16 C17 C18 -176.4(3) . . . . ? 
C16 C17 C18 C19 0.5(7) . . . . ? 
C17 C18 C19 C20 -1.4(7) . . . . ? 
C17 C18 C19 C22 177.4(4) . . . . ? 
C18 C19 C20 C21 0.0(7) . . . . ? 
C22 C19 C20 C21 -178.8(4) . . . . ? 
C19 C20 C21 C16 2.3(7) . . . . ? 
C17 C16 C21 C20 -3.1(6) . . . . ? 
S1 C16 C21 C20 175.0(3) . . . . ? 
C29 N2 C23 C24 -15.2(4) . . . . ? 
S2 N2 C23 C24 129.9(3) . . . . ? 
C25 O6 C24 C23 -149.2(4) . . . . ? 
C25 O6 C24 C28 -33.6(4) . . . . ? 
N2 C23 C24 O6 157.3(3) . . . . ? 
N2 C23 C24 C28 40.4(4) . . . . ? 
C24 O6 C25 O5 -168.7(4) . . . . ? 
C24 O6 C25 C26 11.1(4) . . . . ? 
O5 C25 C26 C27 18.5(8) . . . . ? 
O6 C25 C26 C27 -161.3(4) . . . . ? 
O5 C25 C26 C28 -164.6(5) . . . . ? 
O6 C25 C26 C28 15.5(4) . . . . ? 
C27 C26 C28 C24 142.4(5) . . . . ? 
C25 C26 C28 C24 -34.0(4) . . . . ? 
C27 C26 C28 C29 27.3(8) . . . . ? 
C25 C26 C28 C29 -149.0(4) . . . . ? 
O6 C24 C28 C26 42.1(4) . . . . ? 
C23 C24 C28 C26 170.9(3) . . . . ? 
O6 C24 C28 C29 178.3(3) . . . . ? 
C23 C24 C28 C29 -52.9(4) . . . . ? 
C26 C28 C29 N2 154.2(4) . . . . ? 
C24 C28 C29 N2 40.0(4) . . . . ? 
C26 C28 C29 C30 -84.4(5) . . . . ? 
C24 C28 C29 C30 161.5(3) . . . . ? 
C23 N2 C29 C28 -15.4(4) . . . . ? 
S2 N2 C29 C28 -159.9(3) . . . . ? 
C23 N2 C29 C30 -139.1(4) . . . . ? 
S2 N2 C29 C30 76.3(4) . . . . ? 
C28 C29 C30 C31 -70.7(5) . . . . ? 
N2 C29 C30 C31 42.6(5) . . . . ? 
C29 C30 C31 C32 -177.4(3) . . . . ? 
C30 C31 C32 C37 77.3(5) . . . . ? 
C30 C31 C32 C33 -101.4(5) . . . . ? 
C37 C32 C33 C34 -1.7(6) . . . . ? 
C31 C32 C33 C34 177.0(4) . . . . ? 
C32 C33 C34 C35 -0.3(7) . . . . ? 
C33 C34 C35 C36 1.7(7) . . . . ? 
C34 C35 C36 C37 -1.2(7) . . . . ? 
C35 C36 C37 C32 -0.9(7) . . . . ? 
C33 C32 C37 C36 2.3(6) . . . . ? 
C31 C32 C37 C36 -176.4(4) . . . . ? 
O7 S2 C38 C43 26.5(4) . . . . ? 
O8 S2 C38 C43 158.6(3) . . . . ? 
N2 S2 C38 C43 -87.6(4) . . . . ? 
O7 S2 C38 C39 -155.2(3) . . . . ? 
O8 S2 C38 C39 -23.0(4) . . . . ? 
N2 S2 C38 C39 90.8(3) . . . . ? 
C43 C38 C39 C40 2.9(6) . . . . ? 
S2 C38 C39 C40 -175.5(3) . . . . ? 
C38 C39 C40 C41 -1.4(6) . . . . ? 
C39 C40 C41 C42 -1.3(6) . . . . ? 
C39 C40 C41 C44 179.1(4) . . . . ? 
C40 C41 C42 C43 2.5(6) . . . . ? 
C44 C41 C42 C43 -177.9(4) . . . . ? 
C41 C42 C43 C38 -1.1(6) . . . . ? 
C39 C38 C43 C42 -1.7(6) . . . . ? 
S2 C38 C43 C42 176.7(3) . . . . ? 
 
_diffrn_measured_fraction_theta_max    0.969 
_diffrn_reflns_theta_full              24.00 
_diffrn_measured_fraction_theta_full   0.969 
_refine_diff_density_max    0.507 
_refine_diff_density_min   -0.249 
_refine_diff_density_rms    0.052 
